# Supplementary material for: Dicer-1-dependent Dacapo suppression acts downstream of Insulin receptor in regulating cell division ofDrosophilagermline stem cells
Source: Oxford University Press journal article supplement (doi:10.1242/dev.025999), 2009-04-01
Supplement: dev025999-sup-025999-tabless1-s2.pdf [file dev025999-sup-025999-tabless1-s2.pdf]

**Table S1. Cycle threshold (CT) of qPCR detecting expression levels of mature miRNAs *miR-8* and *miR-278***

| Cycle threshold                   | <i>miR-8</i> | <i>miR-278</i> |
|-----------------------------------|--------------|----------------|
| <i>FRT42D</i>                     | 22.95±0.039  | 30.64±0.156    |
| <i>FRT42DmiR-278<sup>KO</sup></i> | 22.55±0.569  | 39.22±0.390*   |

Mean±s.e. is shown.

\*The maximum PCR cycle is 40. If the fluorescent signal of the PCR products is not higher than the threshold after 40 cycles, the CT is assigned as 40.

**Table S2. Number of progeny generated by each GSC in regions 1-2A of germarium and number of progeny produced by the heterozygous neighboring control GSC**

| Genotypes (days after larval/pupal heat shock)                                             | Cysts/GSC* |
|--------------------------------------------------------------------------------------------|------------|
| <i>FRT42D/FRT42DGFP</i> (14 d)                                                             | 3.45±0.27  |
| <i>FRT42D/FRT42D</i> (14 d)                                                                | 3.60±0.14  |
| <i>FRT42DmiR-278<sup>KO</sup>/FRT42DGFP</i> (14 d)                                         | 3.29±0.09  |
| <i>FRT42DmiR-278<sup>KO</sup>/FRT42DmiR-278<sup>KO</sup></i> (14 d)                        | 2.47±0.15  |
| <i>FRT42DmiR-278<sup>Gal4K1</sup>/FRT42DGFP</i> (14 d)                                     | 3.38±0.02  |
| <i>FRT42DmiR-278<sup>Gal4K1</sup>/FRT42DmiR-278<sup>K1Gal4</sup></i> (14 d)                | 2.66±0.11  |
| <i>FRT42DmiR-7<sup>Δ1</sup>/FRT42DGFP</i> (8 d)                                            | 4.40±0.11  |
| <i>FRT42DmiR-7<sup>Δ1</sup>/FRT42DmiR-7<sup>Δ1</sup></i> (8 d)                             | 4.33±0.29  |
| <i>CyO/+;FRT82BlnR<sup>ex52.1</sup>/+</i> (8 d)                                            | 4.21±0.16  |
| <i>CyO/+;FRT82BlnR<sup>ex52.1</sup>/FRT82BlnR<sup>ex52.1</sup></i> (8 d)                   | 1.68±0.09  |
| <i>FRT42Bdap<sup>4</sup>/+;FRT82BlnR<sup>ex52.1</sup>/+</i> (8 d)                          | 3.95±0.13  |
| <i>FRT42Bdap<sup>4</sup>/+;FRT82BlnR<sup>ex52.1</sup>/FRT82BlnR<sup>ex52.1</sup></i> (8 d) | 2.37±0.20  |

\*Mean±s.e. of three repeats. At least ten mosaic germaria were counted in each repeat.
